# Supplementary material
Source: HighWire-hosted journal article supplement (https://sti.bmj.com/content/94/7/522)
Supplement: inline-supplementary-material-1 [file inline-supplementary-material-1.docx]

**Table 1a: Adjusted odds ratios (OR) with 95% confidence intervals (CI) for perceiving medium-high versus no/low** **risk for sexually transmitted infections among 18-45-year old women stratified by country (N=42,974)**

| **Variable** | **Denmark** | |  | **Norway** | |  | **Sweden** | |
| --- | --- | --- | --- | --- | --- | --- | --- | --- |
|  | **ORa** | **(95% CI)** |  | **ORa** | **(95% CI)** |  | **ORa** | **(95% CI)** |
|  |  |  |  |  |  |  |  |  |
| **Education** |  |  |  |  |  |  |  |  |
| > High school | 1 | - |  | 1 | - |  | 1 | - |
| < High school | 1.10 | (0.96-1.25) |  | 1.02 | (0.85-1.23) |  | 0.89 | (0.77-1.03) |
|  |  |  |  |  |  |  |  |  |
| **Marital status** |  |  |  |  |  |  |  |  |
| Married/Cohabiting | 1 | - |  | 1 | - |  | 1 | - |
| Single/Divorced/Widow | 7.18 | (6.27-8.22) |  | 5.27 | (4.44-6.26) |  | 5.00 | (4.27-5.84) |
|  |  |  |  |  |  |  |  |  |
| **Alcohol status** |  |  |  |  |  |  |  |  |
| Never/Former | 1 | - |  | 1 | - |  | 1 | - |
| Current |  |  |  |  |  |  |  |  |
| Never binge drinkingb | 0.49 | (0.36-0.65) |  | 1.04 | (0.73-1.49) |  | 0.97 | (0.74-1.27) |
| Binge drinking <once/month | 0.94 | (0.73-1.20) |  | 1.39 | (1.01-1.93) |  | 1.71 | (1.32-2.21) |
| Binge drinking >once/month | 2.28 | (1.79-2.91) |  | 4.44 | (3.23-6.12) |  | 3.63 | (2.80-4.73) |
|  |  |  |  |  |  |  |  |  |
| **Had genital warts in the last year** |  |  |  |  |  |  |  |  |
| No | 1 | - |  | 1 | - |  | 1 | - |
| Yes | 2.88 | (2.06-4.00) |  | 3.15 | (2.10-4.74) |  | 3.62 | (2.45-5.36) |
|  |  |  |  |  |  |  |  |  |
| **New partners in the last 6 months** |  |  |  |  |  |  |  |  |
| 0 | 1 | - |  | 1 | - |  | 1 | - |
| 1 | 4.55 | (3.90-5.30) |  | 3.33 | (2.66-4.17) |  | 3.83 | (3.12-4.71) |
| 2 | 10.47 | (8.61-12.74) |  | 8.42 | (6.43-11.02) |  | 6.46 | (5.10-8.19) |
| >3 | 17.27 | (13.91-21.44) |  | 13.54 | (10.46-17.52) |  | 14.48 | (11.67-17.97) |
|  |  |  |  |  |  |  |  |  |

a Adjusted for age at response(continuous) and type of response

bBinge drinking = more than six alcoholic drinks at one occasion

**Table 1b: Adjusted odds ratios (OR) with 95% confidence intervals (CI) for perceiving medium-high versus no/low risk for sexually transmitted infections among 18-45-year old women stratified by type of response (N=42,974)**

| **Variable** | **Paper-based** | |  | **Web-based** | |  | **Telephone-based** | |
| --- | --- | --- | --- | --- | --- | --- | --- | --- |
|  | **ORa** | **(95% CI)** |  | **ORa** | **(95% CI)** |  | **ORa** | **(95% CI)** |
|  |  |  |  |  |  |  |  |  |
| **Education** |  |  |  |  |  |  |  |  |
| > High school | 1 | - |  | 1 | - |  | 1 | - |
| < High school | 1.04 | (0.94-1.15) |  | 0.96 | (0.80-1.15) |  | 1.22 | (0.99-1.50) |
|  |  |  |  |  |  |  |  |  |
| **Marital status** |  |  |  |  |  |  |  |  |
| Married/Cohabiting | 1 | - |  | 1 | - |  | 1 | - |
| Single/Divorced/Widow | 5.92 | (5.31-6.60) |  | 5.41 | (4.50-6.52) |  | 7.28 | (5.64-9.40) |
|  |  |  |  |  |  |  |  |  |
| **Alcohol status** |  |  |  |  |  |  |  |  |
| Never/Former | 1 | - |  | 1 | - |  | 1 | - |
| Current |  |  |  |  |  |  |  |  |
| Never binge drinkingd | 0.80 | (0.64-1.00) |  | 0.78 | (0.54-1.14) |  | 0.77 | (0.50-1.17) |
| Binge drinking <once/month | 1.37 | (1.12-1.67) |  | 1.15 | (0.82-1.62) |  | 1.26 | (0.87-1.83) |
| Binge drinking >once/month | 3.48 | (2.85-4.26) |  | 3.09 | (2.19-4.35) |  | 2.78 | (1.94-3.98) |
|  |  |  |  |  |  |  |  |  |
| **Had genital warts in the last year** |  |  |  |  |  |  |  |  |
| No | 1 | - |  | 1 | - |  | 1 | - |
| Yes | 2.91 | (2.24-3.78) |  | 3.12 | (1.93-5.05) |  | 4.85 | (2.67-8.83) |
|  |  |  |  |  |  |  |  |  |
| **New partners in the last 6 months** |  |  |  |  |  |  |  |  |
| 0 | 1 | - |  | 1 | - |  | 1 | - |
| 1 | 4.18 | (3.64-4.79) |  | 3.91 | (3.11-4.91) |  | 4.06 | (3.08-5.34) |
| 2 | 7.99 | (6.75-9.46) |  | 7.92 | (6.00-10.45) |  | 12.37 | (9.04-16.92) |
| >3 | 15.02 | (12.75-17.69) |  | 14.29 | (10.71-19.07) |  | 19.01 | (13.58-26.59) |
|  |  |  |  |  |  |  |  |  |

a Adjusted for country and age at response (continuous)

bBinge drinking = more than six alcoholic drinks at one occasion
